# Supplementary material for: HR-GLDD: a globally distributed dataset using generalized deep learning (DL) for rapid landslide mapping on high-resolution (HR) satellite imagery
Source: Copernicus journal article supplement (doi:10.5194/essd-15-3283-2023), 2023-07-27
Supplement: Supplementary file 1 [file essd-15-3283-2023-supplement.pdf]

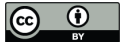

*Supplement of*

**HR-GLDD: a globally distributed dataset using generalized deep learning (DL) for rapid landslide mapping on high-resolution (HR) satellite imagery**

**Sansar Raj Meena et al.**

*Correspondence to:* Sansar Raj Meena ([sansarraj.meena@unipd.it](mailto:sansarraj.meena@unipd.it))

The copyright of individual parts of the supplement might differ from the article licence.

SUPPLEMENTARY MATERIALS

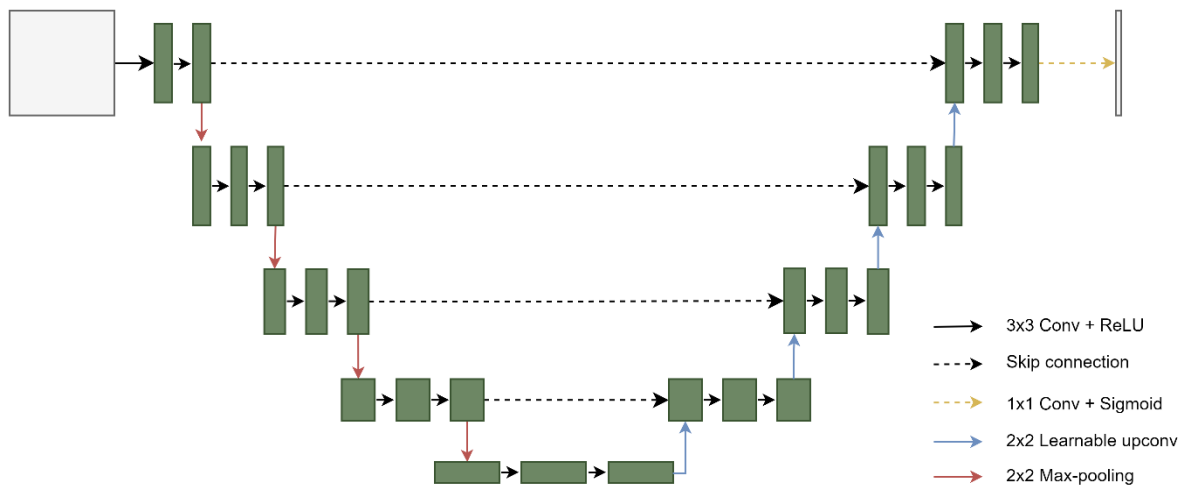

Figure S1: Model architecture of the conventional U-Net.

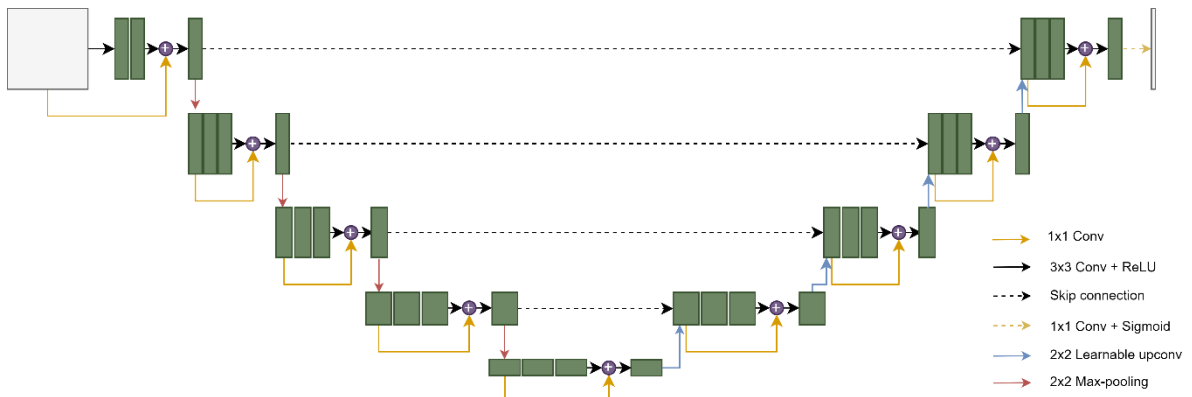

Figure S2: Model architecture of the Res U-Net.

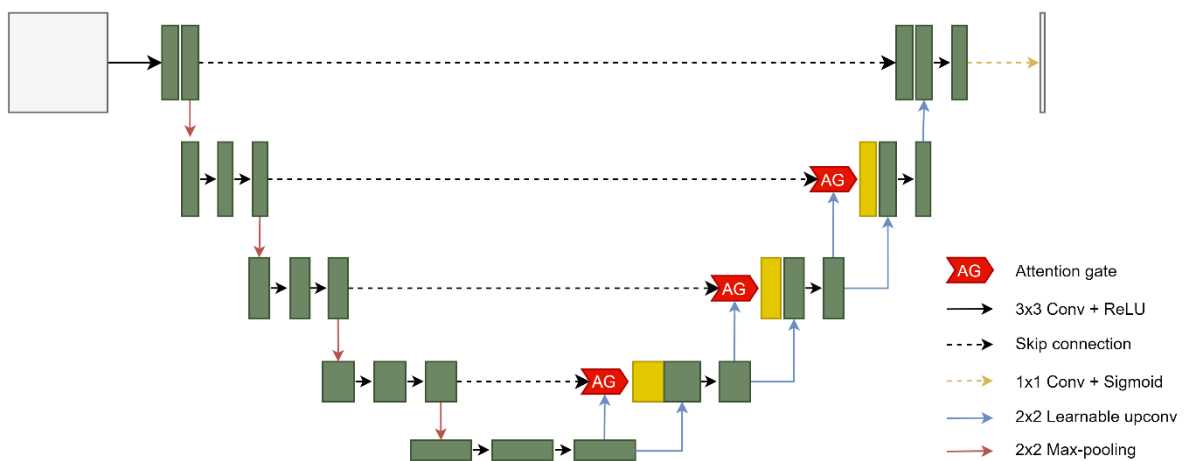

Figure S3: Model architecture of the Attention U-Net.

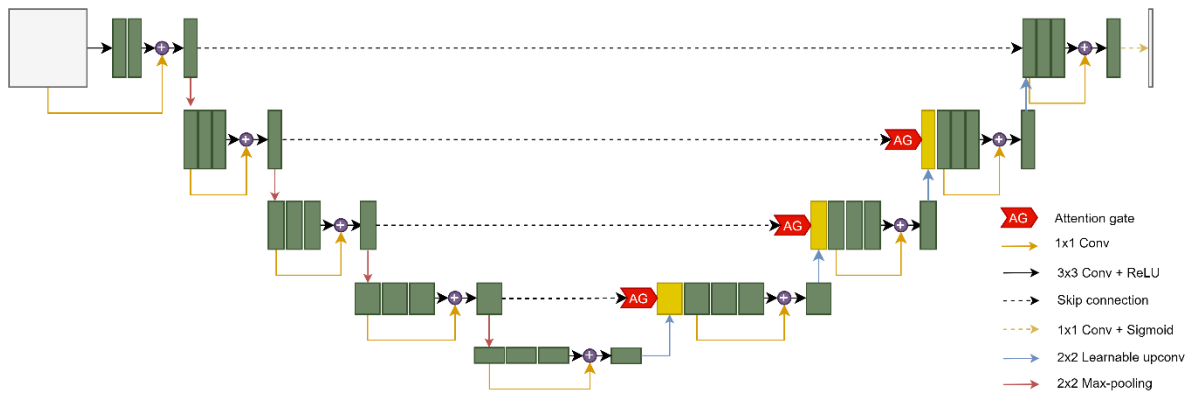

Figure S4: Model architecture of the Attention Res U-Net.

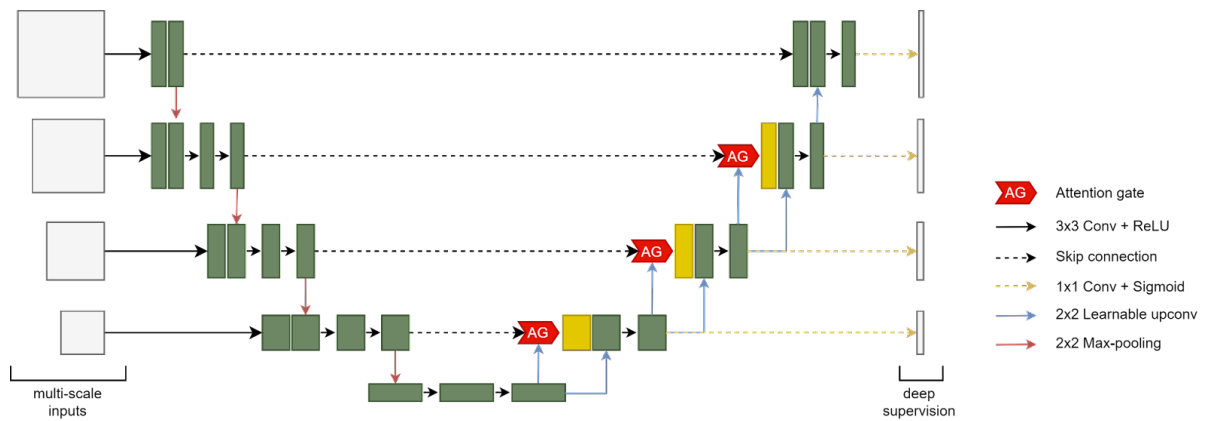

Figure S5: Model architecture of the Attention Deep Supervision Multi-Scale U-Net.
